# Supplementary material
Source: PubMed Central journal article supplement (PMC1626346)
Supplement: bmj_333_7574_890__1.pdf [file bmj_333_7574_890__1.pdf]

- w1. White DO, Fenner FJ. Prevention, Control and Eradication of Viral Diseases. In: *Medical Virology*. 4th ed. San Diego: Academic Press, 1994:256-65.
- w2. de Quadros CA, Izurieta H, Carrasco P, Brana M, Tambini G. Progress towards measles eradication in the region of the Americas. *J Infect Dis* 2003, 187:S102-S110.
- w3. Vukshich Oster N, Harpaz R, Redd SB, Papania MJ. International importation of measles virus – United States, 1993–2001. *J Infect Dis* 2004;189:S48-S53.
- w4. All-Party Parliamentary Group on Primary Care and Public Health. Conclusions on MMR vaccine safety – evidence presented to Parliament in July 2000. [www.hpa.org.uk/infections/topics\\_az/vaccination/ParlGroup.pdf](http://www.hpa.org.uk/infections/topics_az/vaccination/ParlGroup.pdf) (accessed 27 June 2006).
- w5. Health Protection Agency. MMR uptake rises in London 's under 5s. Regional Press Release dated 27 June 2005. [http://www.hpa.org.uk/london/press/MMR\\_27jun05.htm](http://www.hpa.org.uk/london/press/MMR_27jun05.htm) (accessed 29 June 2006).
- w6. World Health Organization. WHO-UNICEF estimates of MCV coverage. [http://www.who.int/immunization\\_monitoring/en/globalsummary/timeseries/tswucov/eragemcv.htm](http://www.who.int/immunization_monitoring/en/globalsummary/timeseries/tswucov/eragemcv.htm) (accessed 7 Oct 2006).
- w7. Richardson M, Elliman D, Maguire H, Simpson J, Nicoll A. Evidence base of incubation periods, periods of infectiousness and exclusion policies for the control of communicable diseases in schools and preschools. *Pediatr Infect Dis J* 2001;20:380-91.
- w8. Wharton M, Chorba TL, Vogt RL, Morse DL, Buehler JW. Case Definitions for Public Health Surveillance. *MMWR* 1990;39(RR-13):1-43. <http://www.cdc.gov/mmwr/preview/mmwrhtml/00025629.htm> (accessed 29 June 2006).
- w9. Cherry, JD. Measles virus. In: Feigin, RD, Cherry, JD, Demmler GJ, Kaplan SL, eds. *Textbook of Pediatric Infectious Diseases*. 5<sup>th</sup> ed. Philadelphia: Saunders, 2004:2283-304.
- w10. Hänninen P, Arstila P, Lang H, Salmi A, Panelius M. Involvement of the central nervous system in acute, uncomplicated measles virus infection. *J Clin Microbiol* 1980;11:610-3.
- w11. Mouallem M, Friedman E, Pauzner R, Farfel Z. Measles epidemic in young adults. Clinical manifestations and laboratory analysis in 40 patients. *Arch Intern Med* 1987;147:1111-3.
- w12. Gavish D, Kleinman Y, Morag A, Chajek-Shaul T. Hepatitis and jaundice associated with measles in young adults. An analysis of 65 cases. *Arch Intern Med* 1983;143:674-7.
- w13. Butler JC, Havens PL, Sowell AL, Huff DL, Peterson DE, Day SE, et al. Measles severity and serum retinol (vitamin A) concentration among children in the United States. *Pediatrics* 1993;91:1176-81.
- w14. Foster A, Sommer A. Corneal ulceration, measles, and childhood blindness in Tanzania. *Br J Ophthalmol* 1987;71:331-43.
- w15. Hutchins SS, Papania MJ, Amler R, Maes EF, Grabowsky M, Bromberg K, et al. Evaluation of the measles clinical case definition. *J Infect Dis* 2004;189:S153-9.

- w16. World Health Organization. WHO-recommended surveillance standard of measles. Published 2003.  
[http://www.who.int/immunization\\_monitoring/diseases/measles\\_surveillance/en/index.html](http://www.who.int/immunization_monitoring/diseases/measles_surveillance/en/index.html) (accessed 29 June 2006).
- w17. Kidd IM, Booth CJ, Rigden SP, Tong CY, MacMahon EM. Measles-associated encephalitis in children with renal transplants: a predictable effect of waning herd immunity? *Lancet* 2003;362:832.

National immunisation coverage reported as a percentage of target population vaccinated with first dose measles containing vaccine in WHO European region member states 1980-2005<sup>w6</sup> [as supplied by authors]

| Country                | 1980 | 1985 | 1990 | 1995 | 2000 | 2005 |
|------------------------|------|------|------|------|------|------|
| Albania                |      | 96   |      | 91   | 95   | 97   |
| Andorra                |      |      |      |      | 98   | 94   |
| Armenia                |      |      |      | 96   | 92   | 94   |
| Austria                |      | 40   | 60   | 60   | 75   | 75   |
| Azerbaijan             |      |      |      | 97   | 99   | 98   |
| Belarus                |      | 56   | 96   | 93   | 98   | 99   |
| Belgium                |      |      | 85   | 85   | 82   | 88   |
| Bosnia and Herzegovina |      |      |      | 53   | 80   | 90   |
| Bulgaria               | 98   | 99   | 99   | 94   | 89   | 96   |
| Croatia                |      |      |      | 92   | 93   | 96   |
| Cyprus                 | 29   |      |      | 83   | 86   | 86   |
| Czech Republic         |      |      |      | 96   |      |      |
| Denmark                |      |      | 84   | 88   | 99   | 95   |
| Estonia                |      |      | 82   | 81   | 93   | 96   |
| Finland                |      |      | 97   | 98   | 96   | 97   |
| France                 |      | 35   | 71   | 83   | 84   |      |
| Georgia                |      |      | 99   | 61   | 97   | 92   |
| Germany                |      | 25   | 50   | 75   | 92   | 93   |
| Greece                 |      | 77   | 76   | 70   |      |      |
| Hungary                | 99   | 99   | 99   | 99   | 99   | 99   |
| Iceland                |      |      | 99   | 99   | 91   | 90   |
| Ireland                |      | 63   |      |      |      | 84   |
| Italy                  |      | 12   | 43   | 50   |      | 87   |
| Kazakhstan             |      |      | 95   | 95   | 99   | 99   |
| Kyrgyzstan             |      |      |      | 97   | 98   | 99   |
| Latvia                 |      | 98   | 97   | 87   | 97   | 95   |
| Lithuania              |      |      |      | 94   | 97   | 97   |
| Luxembourg             |      |      | 80   |      |      | 95   |

|                                       |    |    |    |    |    |    |
|---------------------------------------|----|----|----|----|----|----|
| Malta                                 |    | 10 | 80 | 51 | 74 | 86 |
| Monaco                                |    |    | 99 |    |    |    |
| Netherlands                           | 91 | 92 | 94 | 94 |    | 96 |
| Norway                                |    | 90 | 87 | 92 | 92 | 90 |
| Poland                                | 92 | 92 | 95 | 96 | 97 | 98 |
| Portugal                              | 54 | 70 | 85 | 94 | 87 | 93 |
| Republic of Moldova                   | 94 | 98 | 94 | 99 | 87 | 97 |
| Romania                               |    | 88 | 92 | 93 | 98 | 97 |
| Russian Federation                    |    |    |    | 85 | 97 | 99 |
| San Marino                            |    |    |    |    | 74 | 94 |
| Serbia and Montenegro                 |    | 91 | 83 | 86 | 89 | 96 |
| Slovakia                              |    |    |    | 99 | 98 | 98 |
| Slovenia                              | 85 | 89 | 90 | 93 |    | 94 |
| Spain                                 |    | 79 | 97 | 90 | 94 | 97 |
| Sweden                                | 88 | 94 | 96 | 97 | 91 | 95 |
| Switzerland                           |    |    | 90 |    |    | 82 |
| Tajikistan                            | 86 | 61 | 92 | 80 | 98 | 95 |
| Former Yugoslav Republic of Macedonia |    |    |    | 97 | 97 | 96 |
| Turkey                                | 27 |    | 67 | 65 | 81 | 91 |
| Turkmenistan                          |    |    |    | 92 | 97 | 99 |
| Ukraine                               |    |    |    | 97 | 99 | 96 |
| United Kingdom                        |    |    | 89 | 92 | 88 | 82 |
| Uzbekistan                            |    | 92 | 85 | 91 |    | 99 |
